# Supplementary material for: Integrating Adaptation to Climate Change into Sustainable Development Policy and Planning
Source: MDPI journal article supplement (doi:10.3390/su14137634), 2022-06-22
Supplement: s1 [file s1]

Archive with 1 entries (1 files):
- sustainability-1744099-supplementary.pdf
