# Supplementary material for: Integrating Adaptation to Climate Change into Sustainable Development Policy and Planning
Source: MDPI journal article supplement (doi:10.3390/su14137634), 2022-06-22
Supplement: s1 [file s1 › sustainability-1744099-supplementary.pdf]

**Supplementary Material.** Full list of National Strategic Goals by areas and strategic choices. Source: Italian Ministry for the Environment Land and Sea. Directorate-General for Sustainable Development, Environmental Damage and International Affairs - Division I. *Voluntary National Review ITALY - National Sustainable Development Strategy*. July 2017. Link: <https://sustainabledevelopment.un.org/content/documents/16341Italy.pdf> (last accessed: 10 June 2022).

| Areas  | Strategic Choices                                                                      | National Strategic Goals                                                                                                                                                                                                                                                                                                                                                                                                                                                                                                                                                                                                                                                         |
|--------|----------------------------------------------------------------------------------------|----------------------------------------------------------------------------------------------------------------------------------------------------------------------------------------------------------------------------------------------------------------------------------------------------------------------------------------------------------------------------------------------------------------------------------------------------------------------------------------------------------------------------------------------------------------------------------------------------------------------------------------------------------------------------------|
| Planet | Halt the loss of biodiversity                                                          | <ul style="list-style-type: none"> <li>- Safeguard and improve the conservation status of species and habitats in terrestrial and aquatic ecosystems</li> <li>- Halt the spreading of invasive alien species</li> <li>- Increase terrestrial and maritime protected areas and ensure their effective management</li> <li>- Protect and restore genetic resources and natural ecosystems linked to farming, forestry, and aquaculture</li> <li>- Mainstream natural capital accounting in planning, programming, and national accounting</li> </ul>                                                                                                                               |
|        | Ensure the sustainable management of natural resources                                 | <ul style="list-style-type: none"> <li>- Provide biological diverse and dynamic seas and prevent impacts on maritime and coastal environment</li> <li>- Halt soil consumption and combat desertification</li> <li>- Minimize pollutant loads in soils, water bodies and aquifers, considering the good ecological status of natural systems</li> <li>- Implement integrated water resource management at all levels</li> <li>- Maximize water efficiency and adjust withdrawals to water scarcity</li> <li>- Minimize emissions and reduce air pollutants concentration</li> <li>- Ensure sustainable forest management and combat forest abandonment and degradation</li> </ul> |
|        | Create resilient communities and territories, Protect landscapes and cultural heritage | <ul style="list-style-type: none"> <li>- Prevent anthropogenic and environmental risk and strengthen urban and territorial resilience</li> <li>- Guarantee high environmental performances of buildings, infrastructures, and open spaces</li> <li>- Boost urban regeneration, ensure sustainable urban accessibility and mobility</li> <li>- Ensure ecosystems restoration and defragmentation, strengthen ecological urban-rural connections</li> <li>- Ensure the development of potential and the sustainable management of territories, landscapes, and cultural heritage</li> </ul>                                                                                        |
| People | Fight poverty and social exclusion, eliminating territorial gaps                       | <ul style="list-style-type: none"> <li>- Reduce the intensity of poverty</li> <li>- Fight food and material deprivation</li> <li>- Reduce housing deprivation</li> </ul>                                                                                                                                                                                                                                                                                                                                                                                                                                                                                                         |
|        | Guarantee the conditions for the development of human potential                        | <ul style="list-style-type: none"> <li>- Reduce unemployment for the weakest segments of the population</li> <li>- Ensure the effectiveness of social protection and security system</li> <li>- Reduce the school drop-out rate and enhance the education system</li> <li>- Combat deviance through prevention and social integration of vulnerable individuals</li> </ul>                                                                                                                                                                                                                                                                                                       |
|        | Promote health and wellbeing                                                           | <ul style="list-style-type: none"> <li>- Reduce population exposure to anthropogenic and environmental risk</li> <li>- Promote healthy lifestyles and strengthen preventive healthcare systems</li> </ul>                                                                                                                                                                                                                                                                                                                                                                                                                                                                        |

| Areas       | Strategic Choices                                      | National Strategic Goals                                                                                                                                                                                                                                                                                                                                                                                                                                                                                                                                                                                                                      |
|-------------|--------------------------------------------------------|-----------------------------------------------------------------------------------------------------------------------------------------------------------------------------------------------------------------------------------------------------------------------------------------------------------------------------------------------------------------------------------------------------------------------------------------------------------------------------------------------------------------------------------------------------------------------------------------------------------------------------------------------|
| Prosperity  |                                                        | - Guarantee access to effective healthcare services and reduce territorial gaps                                                                                                                                                                                                                                                                                                                                                                                                                                                                                                                                                               |
|             | Fund and promote sustainable research and innovation   | - Increase the investments in research and development<br>- Implement the digital agenda and improve the spread of smart networks<br>- Innovate processes and products and promote technological transfer                                                                                                                                                                                                                                                                                                                                                                                                                                     |
|             | Ensure full employment and high-quality training       | - Ensure accessible, high quality and permanent training<br>- Increase sustainable and high-quality employment                                                                                                                                                                                                                                                                                                                                                                                                                                                                                                                                |
|             | Ensure sustainable production and consumption patterns | - Dematerialize the economy, improving the efficient use of resources and the circular economy<br>- Promote environmental taxation<br>- Ensure fair access to financial resources<br>- Promote social and environmental responsibility in companies and institutions<br>- Reduce waste production and promote secondary raw material market<br>- Promote the demand and increase the supply of sustainable tourism<br>- Boost sustainable farming and forestry throughout the production and supply chain<br>- Boost sustainable fishing and aquaculture throughout the production and supply chain<br>- Promote Italian excellence worldwide |
|             | Decarbonize the economy                                | - Increase energy efficiency and renewable energy production, avoiding<br>- or reducing impacts on natural and cultural heritage and landscapes<br>- Increase sustainable mobility of people and goods<br>- Reduce greenhouse gas emissions in non-ETS sectors                                                                                                                                                                                                                                                                                                                                                                                |
| Peace       | Promote a nonviolent and inclusive society             | - Prevent violence against women and children and provide adequate assistance to victims<br>- Guarantee migrants' and asylum seekers' reception and the full integration of ethnic and religious minorities                                                                                                                                                                                                                                                                                                                                                                                                                                   |
|             | End discrimination in all its forms                    | - End all forms of labour exploitation and ensure workers' rights<br>- Guarantee gender equality<br>- Combat all forms of discrimination and promote respect for diversity                                                                                                                                                                                                                                                                                                                                                                                                                                                                    |
|             | Ensure legality and justice                            | - Reinforce the fight against crime<br>- Fight bribery and corruption in the public sectors<br>- Ensure just and efficient judiciary system                                                                                                                                                                                                                                                                                                                                                                                                                                                                                                   |
| Partnership | Governance, rights and combat inequalities             | - Strengthen good governance and democracy<br>- Provide support to national and local institutions, social networks, social protection systems, trade unions, Civil Society Organizations<br>- Improve the interaction between State, intermediate bodies and citizens in order to promote human rights and transparency<br>- Promote gender equality and the empowerment of women and enhance the role of women in development                                                                                                                                                                                                               |

| Areas                     | Strategic Choices | National Strategic Goals                                                                                                                                                                                                                                                                                                                                                                                                                                                                                                                                                                                                                                                                                                                                                                                                                                                                                                                                                                                                                                                                                                                                                                                                                                                                                                                                                                                                                                                                                                                                                                                |
|---------------------------|-------------------|---------------------------------------------------------------------------------------------------------------------------------------------------------------------------------------------------------------------------------------------------------------------------------------------------------------------------------------------------------------------------------------------------------------------------------------------------------------------------------------------------------------------------------------------------------------------------------------------------------------------------------------------------------------------------------------------------------------------------------------------------------------------------------------------------------------------------------------------------------------------------------------------------------------------------------------------------------------------------------------------------------------------------------------------------------------------------------------------------------------------------------------------------------------------------------------------------------------------------------------------------------------------------------------------------------------------------------------------------------------------------------------------------------------------------------------------------------------------------------------------------------------------------------------------------------------------------------------------------------|
|                           |                   | <ul style="list-style-type: none"> <li>- Combat gender violence and discrimination against women: improve access to and use of health services, education and training systems, economic and social independence</li> <li>- Improve young people and minors' living conditions, combating: trafficking of young people, women, children and adolescents; work exploitation of children; new forms of slavery; juvenile crime; disabled minors; minors' sexual exploitation; all forms of abuses, among which sexual mutilations; sexual violence; sexual diseases (HIV AIDS); discriminations on the citizenship rights</li> <li>- Encourage youth and children participation to make them "actors of change", promote social integration, inclusive education and training</li> </ul>                                                                                                                                                                                                                                                                                                                                                                                                                                                                                                                                                                                                                                                                                                                                                                                                                  |
| Migration and development |                   | <ul style="list-style-type: none"> <li>- Promote the role of migrants as actors for development</li> <li>- Promote migrants' and diasporas' professional and entrepreneurial skills, in close connection with the Countries of origin</li> <li>- Promote cooperation models between Europe and Africa to prevent and manage migrants' flows by strengthening institutional capacity, creating employment and economic opportunities, supporting micro entrepreneurship and infrastructure investments</li> <li>- Encouraging the adoption of measures to promote the competitiveness of products respecting sustainable diet principles</li> <li>- Provide qualified technical assistance, training and institutional capacity building in order to strengthen the commitment to the development of key production chains recalling the peculiar Italian development model - SMEs and local districts -, increasing productivity and production, improving quality, enhancing product typicality, spreading good farming practices, preserving production areas, promoting fair trade, technology transfer, agroindustry development and export</li> <li>- Strengthen education and training, institutional capacity, transfer of know-how, technology and innovation and addressing heritage protection, even in post-conflict crisis and natural disasters</li> <li>- Launch and set up pilot initiatives oriented towards a greater understanding of landscape and natural heritage, targeted to different groups among the general public, to be properly monitored and assessed in time</li> </ul> |
| Health                    |                   | <ul style="list-style-type: none"> <li>- Improve access to health services and contribute to the extension of universal health coverage</li> <li>- Strengthen basic healthcare systems and staff training</li> <li>- Limit risk factors and the impact of health emergencies: improve early warning and prevention mechanisms</li> <li>- Be committed to fight against pandemics, particularly AIDS, and to promote vaccination campaigns (Global Fund, GAVI)</li> <li>- Support scientific research, promote health and prevention awareness</li> <li>- Carry on a forceful action to relaunch public health functions and to support health reforms</li> </ul>                                                                                                                                                                                                                                                                                                                                                                                                                                                                                                                                                                                                                                                                                                                                                                                                                                                                                                                                        |

| Areas | Strategic Choices                         | National Strategic Goals                                                                                                                                                                                                                                                                                                                                                                                                                                                                                                                                                                                                                                                                                                                                                                                                                                                                                                                                                                                                                                                                                                                            |
|-------|-------------------------------------------|-----------------------------------------------------------------------------------------------------------------------------------------------------------------------------------------------------------------------------------------------------------------------------------------------------------------------------------------------------------------------------------------------------------------------------------------------------------------------------------------------------------------------------------------------------------------------------------------------------------------------------------------------------------------------------------------------------------------------------------------------------------------------------------------------------------------------------------------------------------------------------------------------------------------------------------------------------------------------------------------------------------------------------------------------------------------------------------------------------------------------------------------------------|
|       | Education                                 | <ul style="list-style-type: none"> <li>- Ensure high quality basic education without gender discrimination</li> <li>- Promote training and improve professional skills of teachers, school staff and development workers</li> <li>- Provide inclusive education for the most disadvantaged, marginalized and discriminated social groups</li> <li>- Promote social and employment integration of young people and unemployed adults by offering professional training</li> <li>- Valorise Universities contribution:</li> </ul> <p>Define training paths offering new professional skills, addressed to students from partner countries</p> <p>Contribute to the development and strengthening of institutional capacities</p> <p>Train future professionals and leaders in partner Countries</p> <p>Provide research tools in order to produce innovation for development and to deliver assessment methods and models in line with good international practices</p>                                                                                                                                                                               |
|       | Sustainable agriculture and food security | <ul style="list-style-type: none"> <li>- Ensure governance and access to land, water, natural and productive resources by farmers' families and small-scale producers</li> <li>- Support and develop traditional adaptation techniques to biotic and abiotic factors</li> <li>- Strengthen the capacity to cope with natural disasters by also promoting "green infrastructure"</li> <li>- Promote agricultural, environmental and social policies supporting family farming and craft fishery</li> <li>- Encouraging the adoption of measures to promote the competitiveness of products respecting sustainable diet principles</li> <li>- Provide qualified technical assistance, training and institutional capacity building in order to strengthen the commitment to the development of key production chains recalling the peculiar Italian development model - SMEs and local districts -, increasing productivity and production, improving quality, enhancing product typicality, spreading good farming practices, preserving production areas, promoting fair trade, technology transfer, agroindustry development and export</li> </ul> |

| Areas                                                  | Strategic Choices                                                                                                                                                                                                                                                                                                                                                                                                                                                                                                                                                                                                                                                                                                                                                                                                                                                                                                                                                                                                                                                                                                                     | National Strategic Goals |
|--------------------------------------------------------|---------------------------------------------------------------------------------------------------------------------------------------------------------------------------------------------------------------------------------------------------------------------------------------------------------------------------------------------------------------------------------------------------------------------------------------------------------------------------------------------------------------------------------------------------------------------------------------------------------------------------------------------------------------------------------------------------------------------------------------------------------------------------------------------------------------------------------------------------------------------------------------------------------------------------------------------------------------------------------------------------------------------------------------------------------------------------------------------------------------------------------------|--------------------------|
| Environment, climate change and energy for development | <ul style="list-style-type: none"> <li>- Engage the private national sector, from cooperatives to agro-business, by promoting partnerships</li> <li>- Promote actions in the fields of reforestation, sustainable urban regeneration, preservation of protected terrestrial and marine areas, wetlands and river basins, sustainable fisheries management, land and soil recovery, particularly by revitalising family farming</li> <li>- Contribute to increase resilience and manage new environmental risks in most vulnerable regions</li> <li>- Promote technology transfers - also involving profit actors - in areas such as energy, transport, industry and urban management</li> <li>- Promote energy for development: appropriate and sustainable technologies optimized for local contexts particularly in rural areas; new models for income generating energy activities; support to the development of enabling policies and regulatory mechanisms that lead to energy governance modernization based on local needs; development of technical and managerial skills of locals, through multi-level training</li> </ul> |                          |
| Preservation of cultural and natural heritage          | <ul style="list-style-type: none"> <li>- Contribute to economic diversification - particularly in rural, mountain and inner areas - to income generation and employment, to sustainable tourism promotion, to urban development and environmental protection, to cultural tourism industry support, to valorisation of local handicraft and traditional crafts recovery</li> <li>- Strengthen education and training, institutional capacity, transfer of know-how, technology and innovation and addressing heritage protection, even in post-conflict crisis and natural disasters</li> <li>- Launch and set up pilot initiatives oriented towards a greater understanding of landscape and natural heritage, targeted to different groups among the general public, to be properly monitored and assessed in time</li> </ul>                                                                                                                                                                                                                                                                                                       |                          |
| The private sector                                     | <ul style="list-style-type: none"> <li>- Promote innovative financial instruments to stimulate the “leverage” effect with private funds and improving access to credit by SMEs in partner Countries; promote structured dialogue with the private sector and the Civil Society; support the transfer of know-how in the areas of excellence of the Italian economy</li> <li>- Encourage innovative forms of collaboration between private profit and non-profit sector, with particular reference to the Civil Society Organizations in partner Countries, in order to support local entrepreneurship, with the aim of contributing to the fight against poverty through creating jobs and inclusive economic growth</li> </ul>                                                                                                                                                                                                                                                                                                                                                                                                       |                          |
